# Supplementary material for: Genetic analysis of peste des petits ruminants virus from Pakistan
Source: Springer Nature journal article supplement (doi:10.1186/1746-6148-9-60), 2013-03-28
Supplement: 12917_2012_636_MOESM1_ESM.pdf [file 12917_2012_636_MOESM1_ESM.pdf]

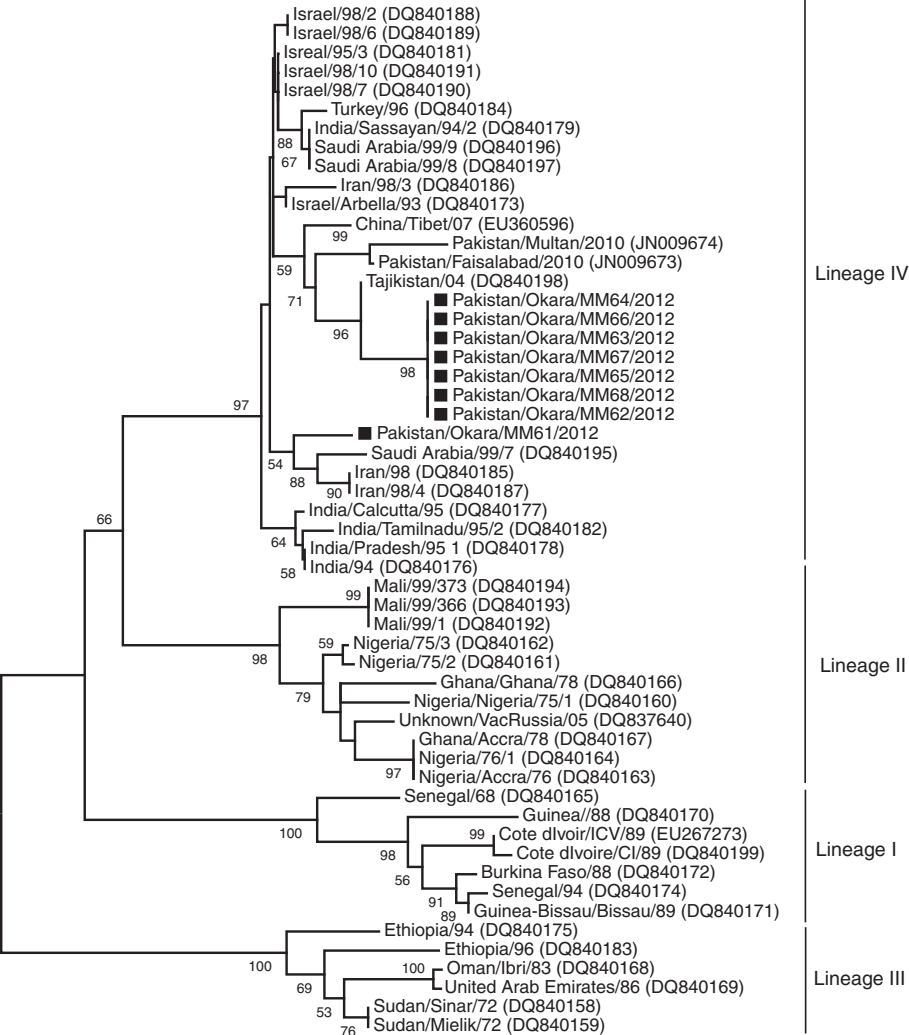

Israel/98/2 (DQ840188)

Israel/98/6 (DQ840189)

Israel/95/3 (DQ840181)

Israel/98/10 (DQ840191)

Israel/98/7 (DQ840190)

Turkey/96 (DQ840184)

India/Sassayan/94/2 (DQ840179)

Saudi Arabia/99/9 (DQ840196)

Saudi Arabia/99/8 (DQ840197)

Iran/98/3 (DQ840186)

Israel/Arbella/93 (DQ840173)

China/Tibet/07 (EU360596)

Pakistan/Multan/2010 (JN009674)

Pakistan/Faisalabad/2010 (JN009673)

Tajikistan/04 (DQ840198)

■ Pakistan/Okara/MM64/2012

■ Pakistan/Okara/MM66/2012

■ Pakistan/Okara/MM63/2012

■ Pakistan/Okara/MM67/2012

■ Pakistan/Okara/MM65/2012

■ Pakistan/Okara/MM68/2012

■ Pakistan/Okara/MM62/2012

■ Pakistan/Okara/MM61/2012

Saudi Arabia/99/7 (DQ840195)

Iran/98 (DQ840185)

Iran/98/4 (DQ840187)

India/Calcutta/95 (DQ840177)

India/Tamilnadu/95/2 (DQ840182)

India/Pradesh/95/1 (DQ840178)

India/94 (DQ840176)

Mali/99/373 (DQ840194)

Mali/99/366 (DQ840193)

Mali/99/1 (DQ840192)

Nigeria/75/3 (DQ840162)

Nigeria/75/2 (DQ840161)

Ghana/Ghana/78 (DQ840166)

Nigeria/Nigeria/75/1 (DQ840160)

Unknown/VacRussia/05 (DQ837640)

Ghana/Accra/78 (DQ840167)

Nigeria/76/1 (DQ840164)

Nigeria/Accra/76 (DQ840163)

Senegal/68 (DQ840165)

Guinea/88 (DQ840170)

Cote d'Ivoire/ICV/89 (EU267273)

Cote d'Ivoire/CI/89 (DQ840199)

Burkina Faso/88 (DQ840172)

Senegal/94 (DQ840174)

Guinea-Bissau/Bissau/89 (DQ840171)

Ethiopia/94 (DQ840175)

Ethiopia/96 (DQ840183)

Oman/Ibri/83 (DQ840168)

United Arab Emirates/86 (DQ840169)

Sudan/Sinar/72 (DQ840158)

Sudan/Mielik/72 (DQ840159)
