# Supplementary material for: Genetic analysis of peste des petits ruminants virus from Pakistan
Source: Springer Nature journal article supplement (doi:10.1186/1746-6148-9-60), 2013-03-28

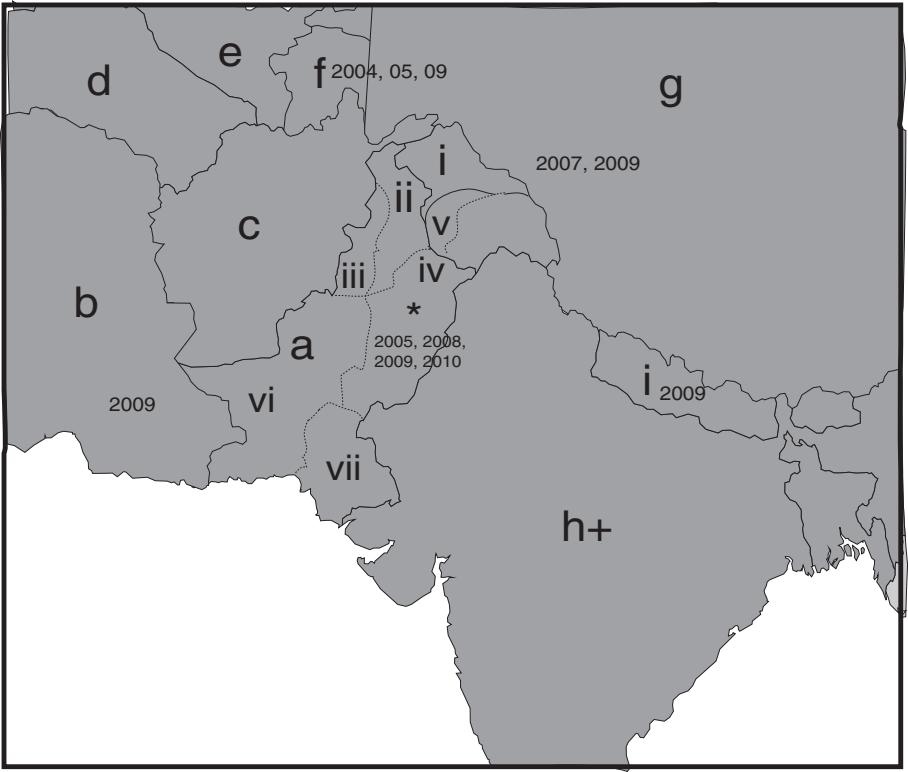

Supplement: 12917_2012_636_MOESM2_ESM.pdf [file 12917_2012_636_MOESM2_ESM.pdf]
